# Supplementary material for: Fabrication and Investigation of 26NCA Films Exhibiting Tunable Blue Fluorescence Based on LVPVDM
Source: Hindawi journal article supplement (doi:10.1155/2018/5426427), 2018-01-01
Supplement: f1 [file 5426427.f1.pdf]

# **Supporting Information for**

## **Fabrication and investigation of 26NCA films exhibiting tunable blue fluorescence based on LVPVDM**

Yufeng Ding, Liangliang Pan, Siqi Li, Huimei He, Dapeng Zhang, Xinyue Hu, Ruoyu Zhang, Yun Wang<sup>\*</sup>, Xiaoyu Zhai<sup>\*</sup>, and Qingyun Meng<sup>\*</sup>

*Beijing University of Chemical Technology, Beijing 100029, P. R. China*

Correspondence and requests for materials should be addressed to Q. Y. M. (mqybuct@163.com); X. Y. Z. (xiaoyuzhai1992@163.com); Y. W. (wyun@mail.buct.edu.cn)

### **List of Contents**

**Structural study and surface morphology of single/two-component films**

**Structural study and surface morphology of single-component metallic In film**

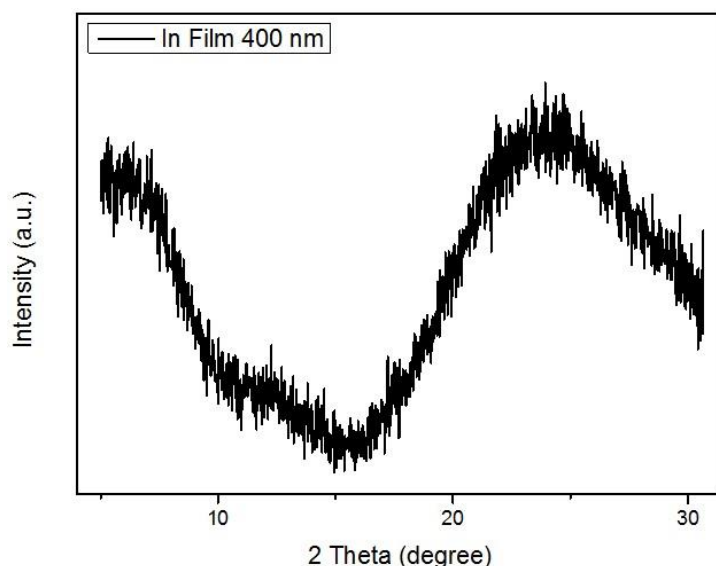

**Figure S1.** XRD pattern of 400 nm In film.

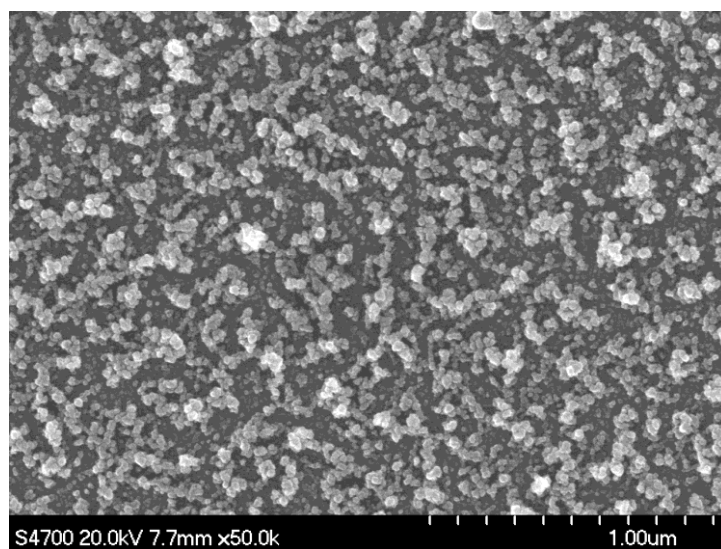

**Figure S2.** SEM image of 400 nm In film.

### Structural study and surface morphology of single-component organic 26NCA films

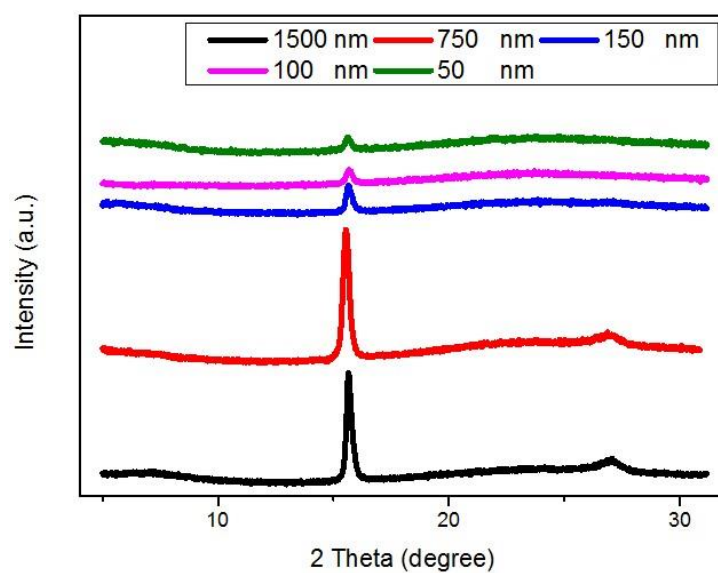

**Figure S3.** XRD patterns of 26NCA films with different thickness.

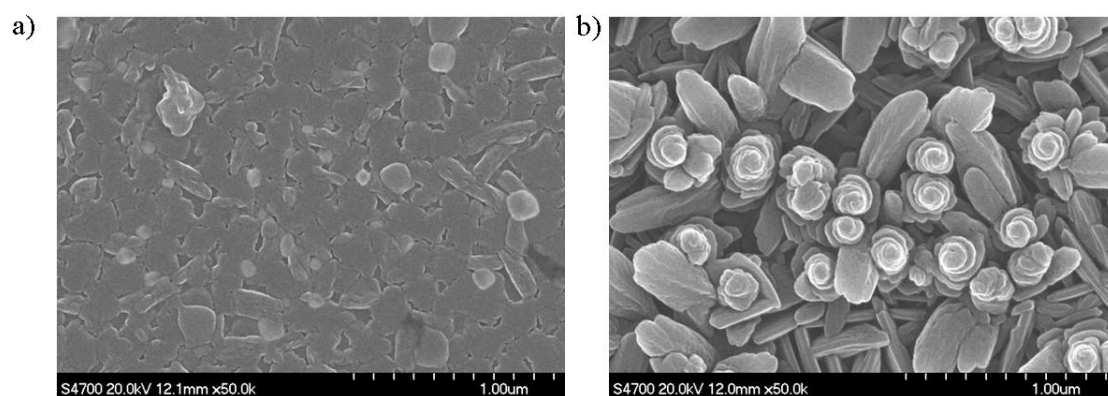

**Figure S4.** SEM images of 26NCA films (left: 50 nm and right: 1500 nm).

## Structural study and surface morphology of two-component 26NCA/In layer films

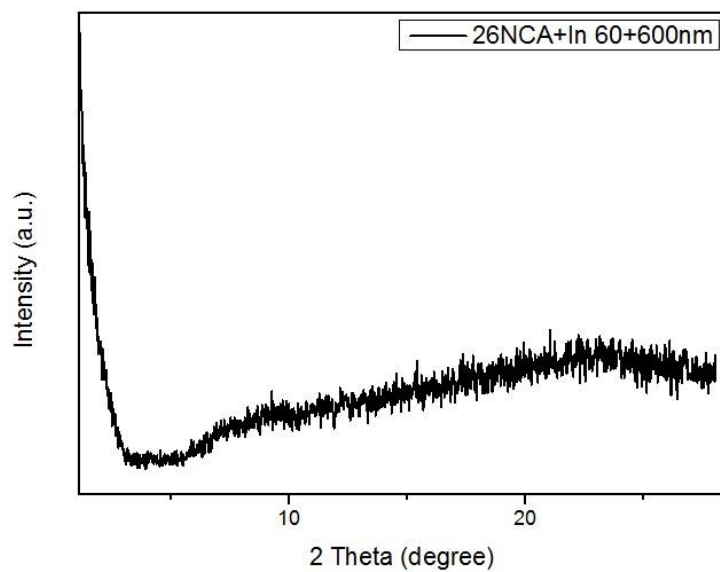

**Figure S5.** XRD pattern of 60 nm/600 nm 26NCA/In layer film.

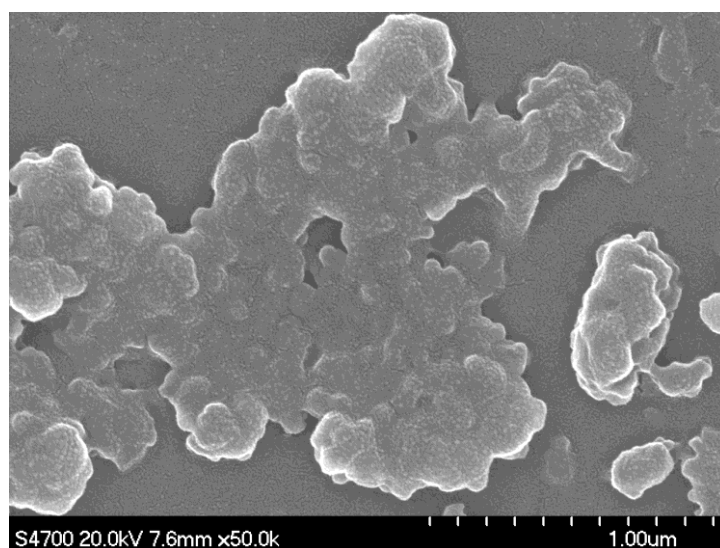

**Figure S6.** SEM image of 60 nm/600 nm 26NCA/In layer film.

## Structural study and surface morphology of two-component 26NCA/OFN films

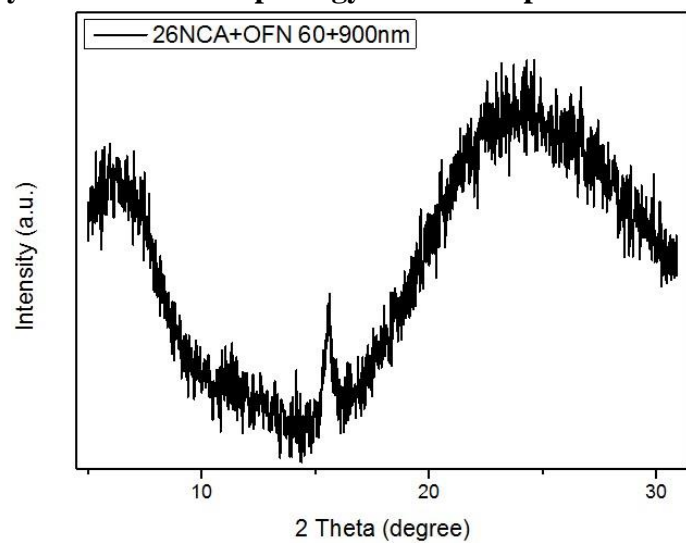

**Figure S7.** XRD pattern of 60 nm/900 nm 26NCA/OFN layer film.

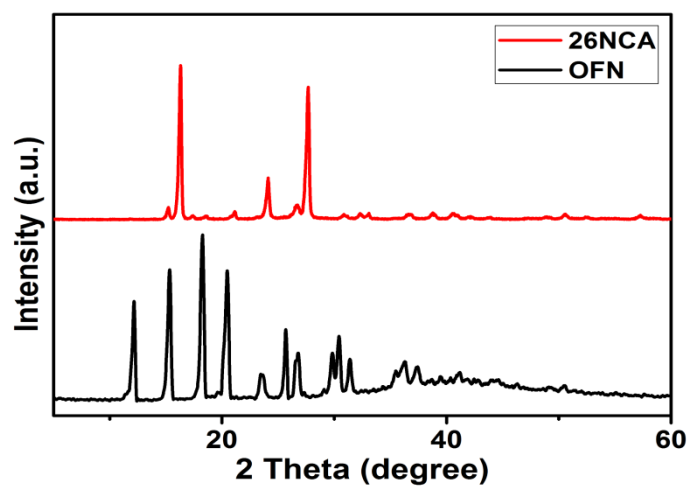

**Figure S8.** XRD patterns of pristine 26NCA and OFN.

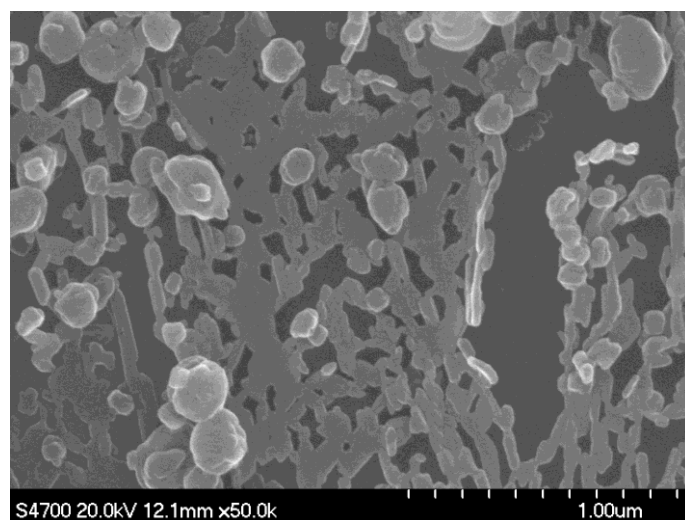

**Figure S9.** SEM image of 60 nm/900 nm 26NCA/OFN layer film.

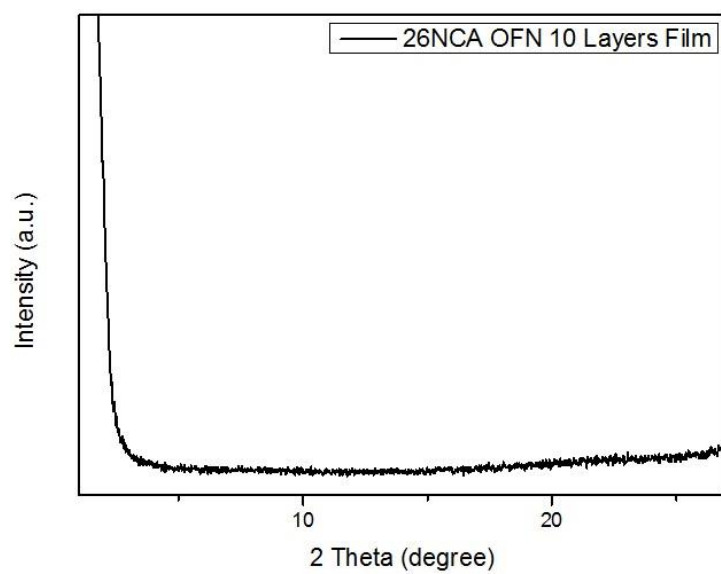

**Figure S10.** XRD pattern of 26NCA/OFN 10 layers film.

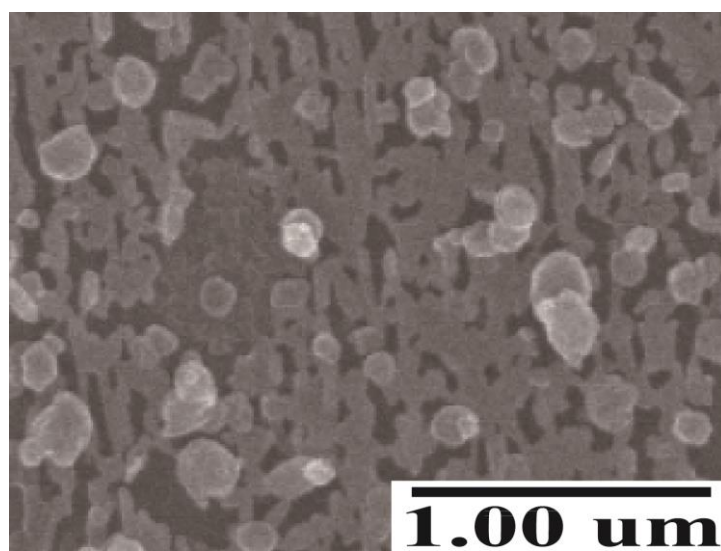

**Figure S11.** SEM image of 26NCA/OFN 10 layers film.
